# Supplementary material for: Improved delivery and competitive adsorption of paclitaxel and mitomycin C anticancer drugs on boron nitride nanoparticles: a molecular dynamics insight
Source: Royal Society of Chemistry journal article supplement (doi:10.1039/d1cp04006e), 2022-01-01
Supplement: d1cp04006e1.pdf [file d1cp04006e1.pdf]

## Supplementary Information

# Improved drug delivery and competitive adsorption of paclitaxel and mitomycin C anticancer drugs on the Boron-nitride nanoparticles: a molecular dynamics insight

Mohaddeseh Habibzadeh Mashatooki \*, Bahram Ghalami-Choobar \*

Department of Chemistry, Faculty of Science, University of Guilan, P.O. Box: 19141, Rasht, Iran

\* Corresponding Authors; Email: [m\\_habibzadeh@phd.guilan.ac.ir](mailto:m_habibzadeh@phd.guilan.ac.ir) (M. Habibzadeh Mashatooki), [B-Ghalami@guilan.ac.ir](mailto:B-Ghalami@guilan.ac.ir) (B. Ghalami-Choobar)

**Table S1.** Water molecules density profile of two studied systems.

| Distance | System containing PX<br>on BNNS | System containing PX and<br>MMC on BNNS |
|----------|---------------------------------|-----------------------------------------|
| -9.5     | 0.15                            |                                         |
| -8.5     | 0.78                            |                                         |
| -7.5     | 1.35                            |                                         |
| -6.5     | 0.99                            |                                         |
| -5.5     | 0.56                            |                                         |
| -4.5     | 2.48                            |                                         |
| -3.5     | 0.43                            |                                         |
| -2.5     | 0.27                            |                                         |
| -1.5     | 0.28                            |                                         |
| -0.5     | 0.25                            |                                         |
| 0.5      | 0.26                            |                                         |
| 1.5      | 0.27                            |                                         |
| 2.5      | 0.31                            | 0.00                                    |
| 3.5      | 0.48                            | 0.09                                    |
| 4.5      | 2.24                            | 2.51                                    |
| 5.5      | 0.48                            | 0.47                                    |
| 6.5      | 1.01                            | 0.62                                    |
| 7.5      | 1.12                            | 1.48                                    |
| 8.5      | 0.86                            | 0.72                                    |
| 9.5      | 0.98                            | 1.01                                    |
| 10.5     | 0.98                            | 0.98                                    |
| 11.5     | 1.00                            | 1.03                                    |
| 12.5     | 0.92                            | 1.01                                    |
| 13.5     | 1.03                            | 0.99                                    |
| 14.5     | 0.92                            | 1.01                                    |
| 15.5     | 1.06                            | 1.11                                    |
| 16.5     | 1.03                            | 0.92                                    |
| 17.5     | 0.94                            | 0.97                                    |
| 18.5     | 0.98                            | 1.03                                    |
| 19.5     | 1.05                            | 0.99                                    |
| 20.5     | 0.92                            | 1.08                                    |
| 21.5     | 1.06                            | 0.99                                    |
| 22.5     | 0.89                            | 0.80                                    |
| 23.5     | 1.03                            | 1.41                                    |
| 24.5     | 0.94                            | 0.81                                    |
| 25.5     | 1.01                            | 0.52                                    |
| 26.5     | 1.09                            | 2.67                                    |
| 27.5     | 0.61                            | 0.09                                    |
| 28.5     | 0.01                            | 0.00                                    |

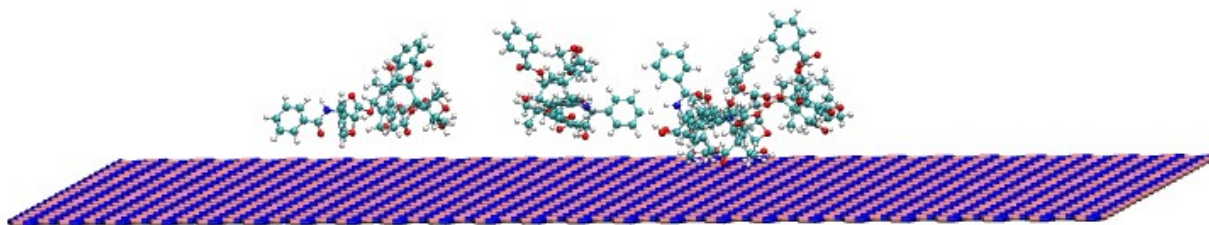

Initial frame of NPT simulation

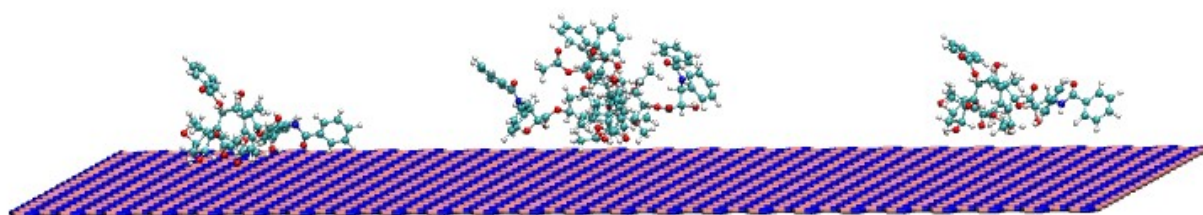

10 ns

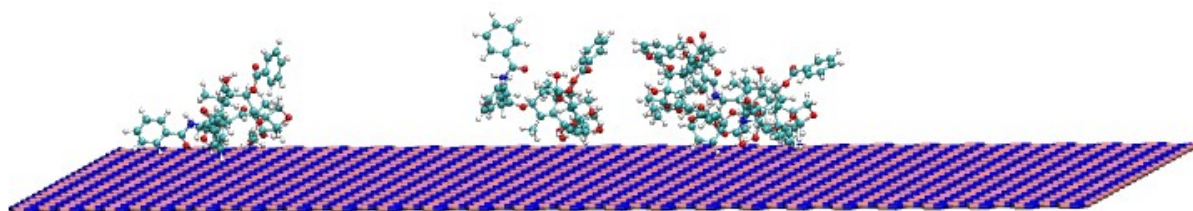

20 ns

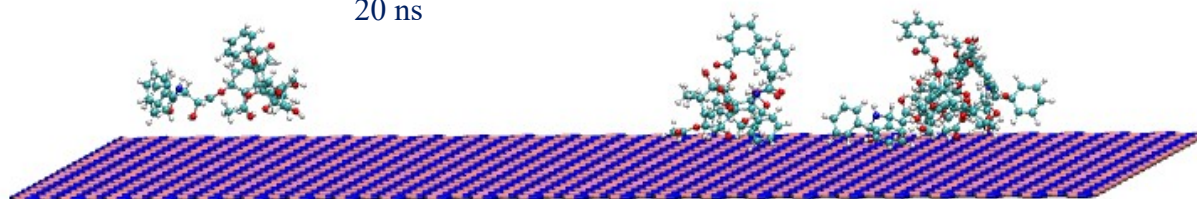

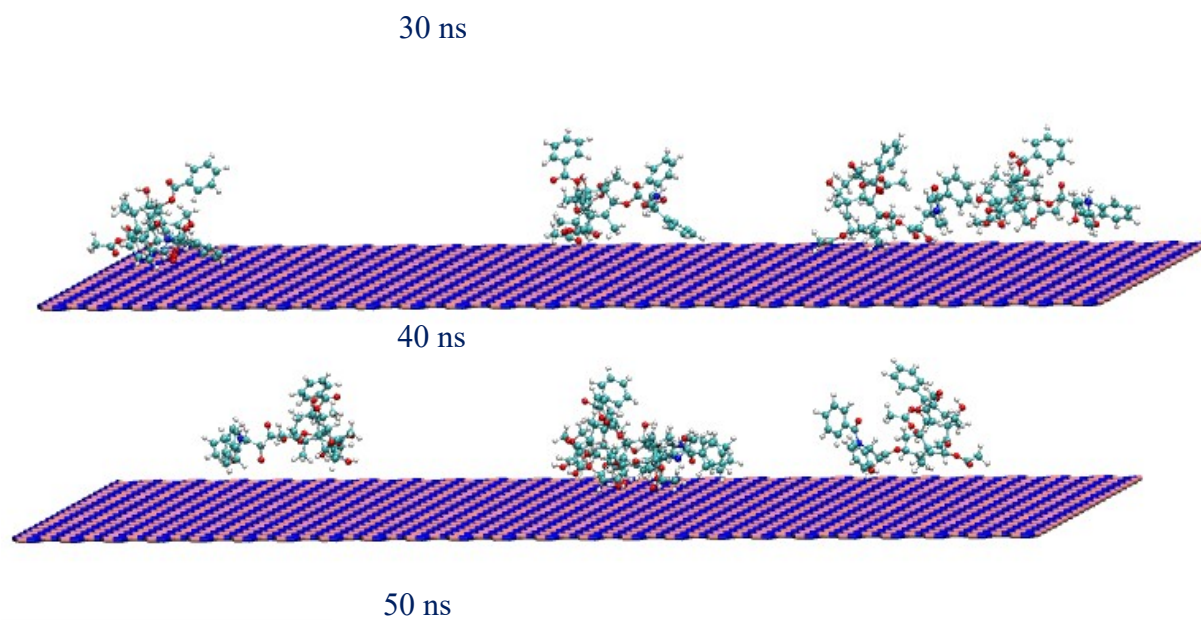

**Figure S1.** The snapshots of the aggregated and immobilized PX ligands on the BNNS surface along the 50 ns simulation trajectories with 10 ns intervals. In this Figure the water molecules had been eliminated for better visualization of drugs aggregation onto the BNNS surface.

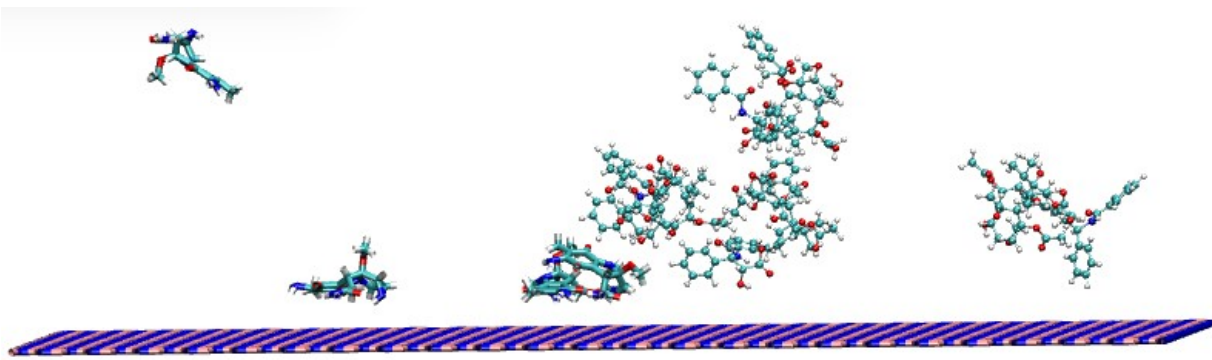

Initial frame of NPT simulation

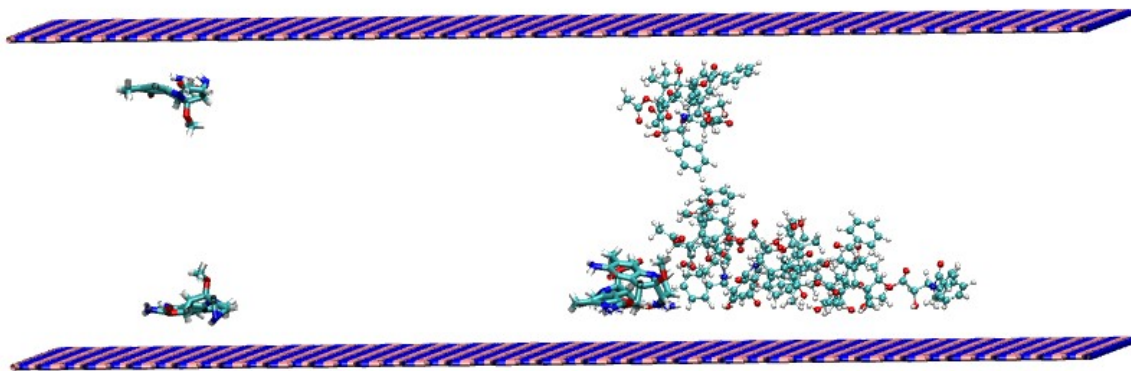

10 ns

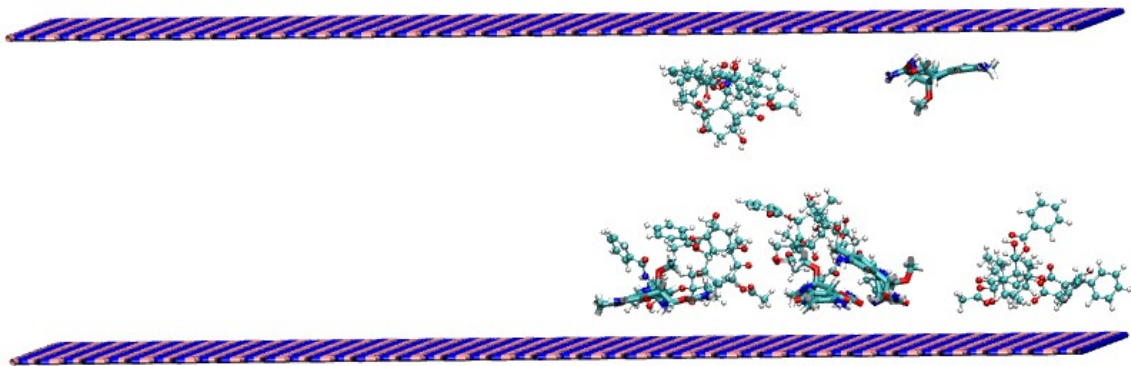

20 ns

30 ns

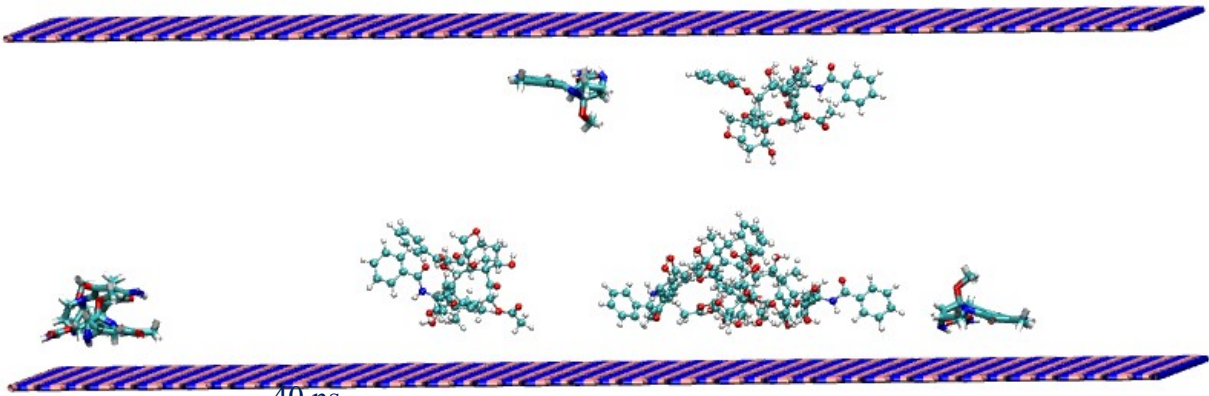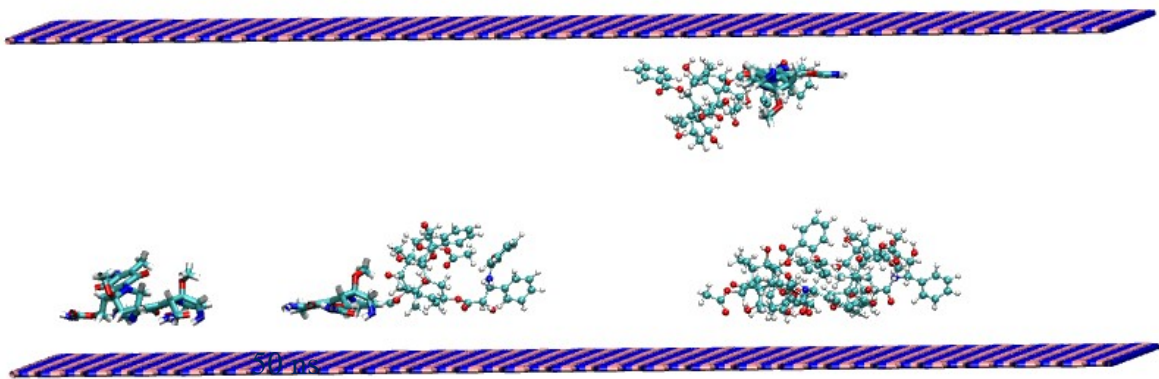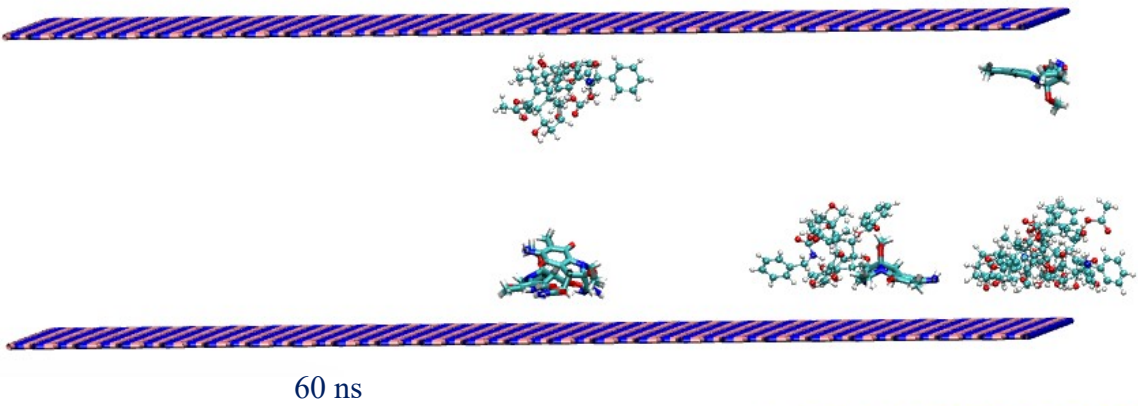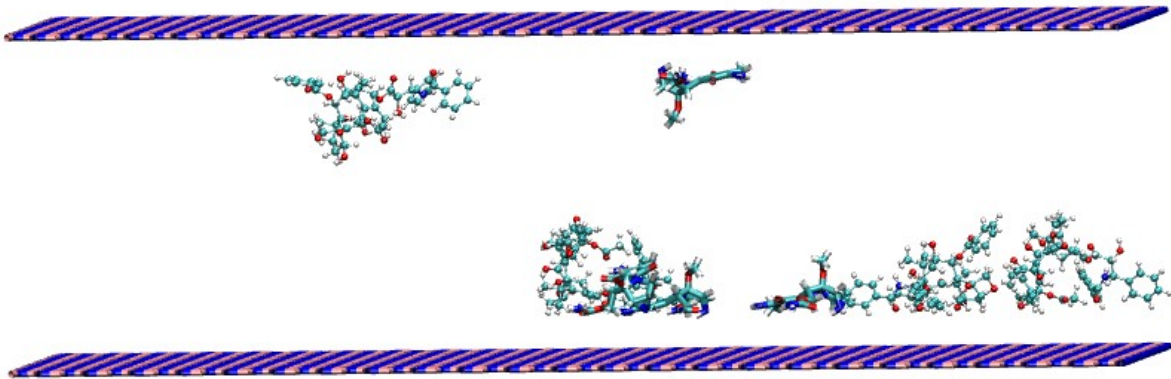

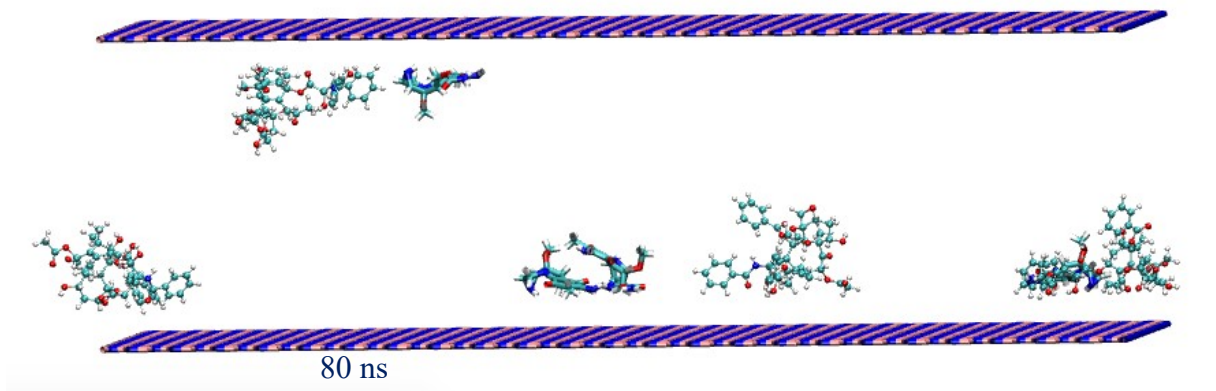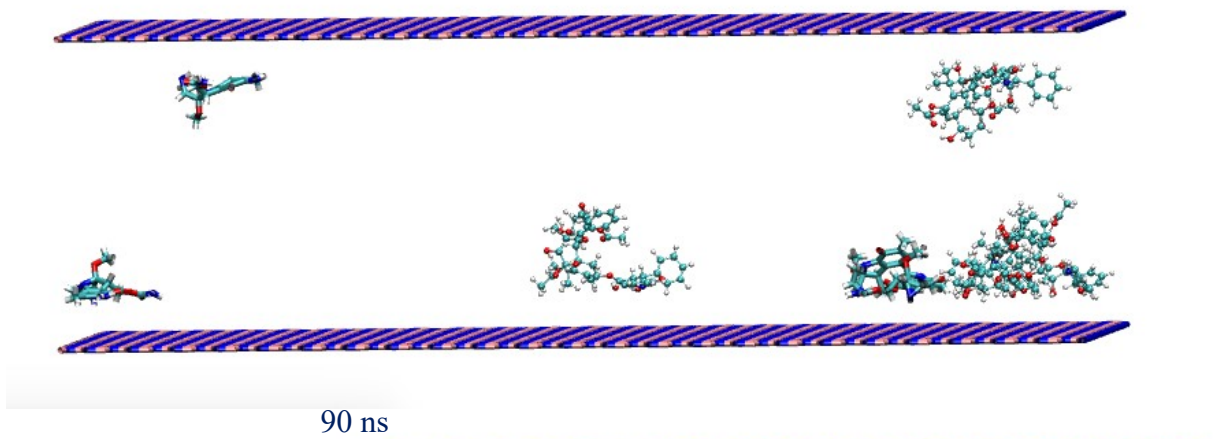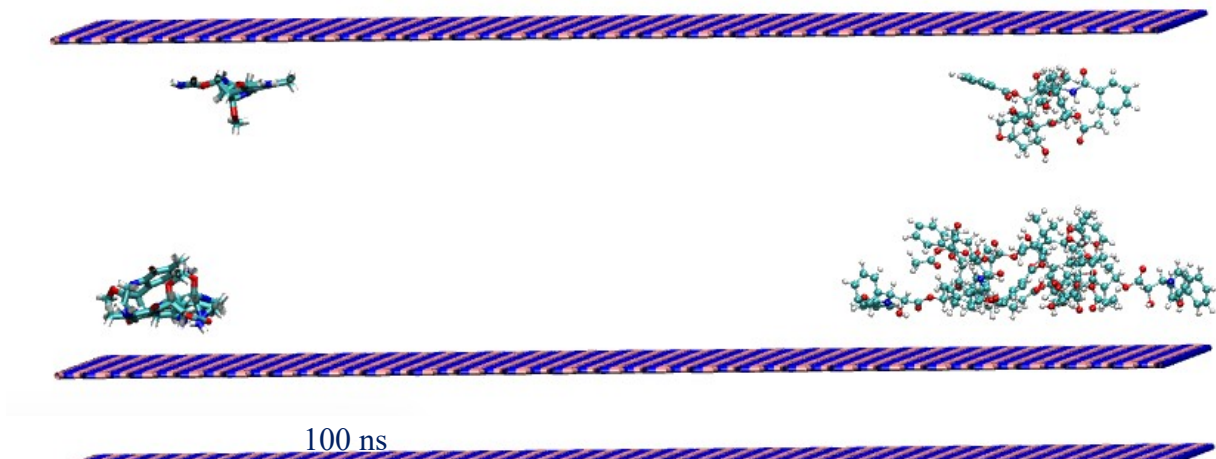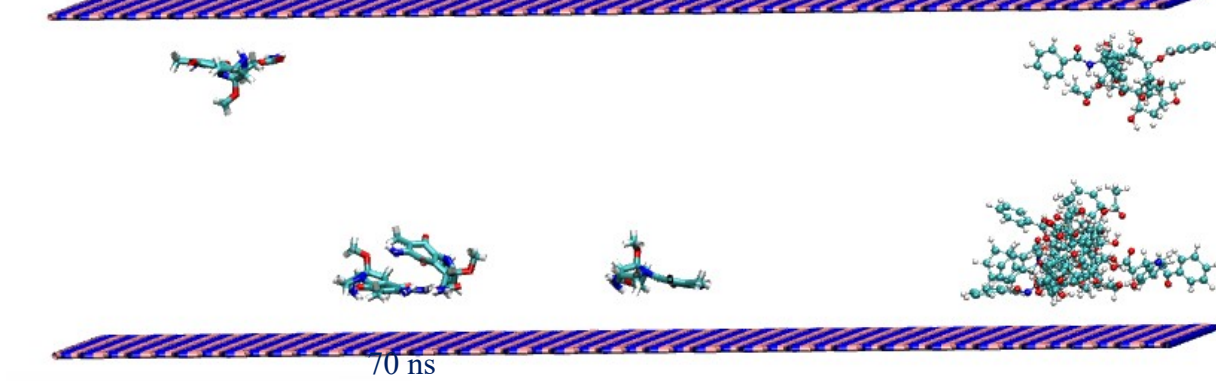

**Figure S2.** The snapshots of the aggregated and immobilized PX and MMC ligands on the BNNS surface along the 100 ns simulation trajectories with 10 ns intervals, the upper sheet presented here is the periodic image of BNNS to indicate the adsorption of all ligands. This Figure is considering the effect of MMC ligands on PX aggregation in comparison to Figure S1. In this Figure the water molecules had been eliminated for better visualization of drugs aggregation onto the BNNS surface.



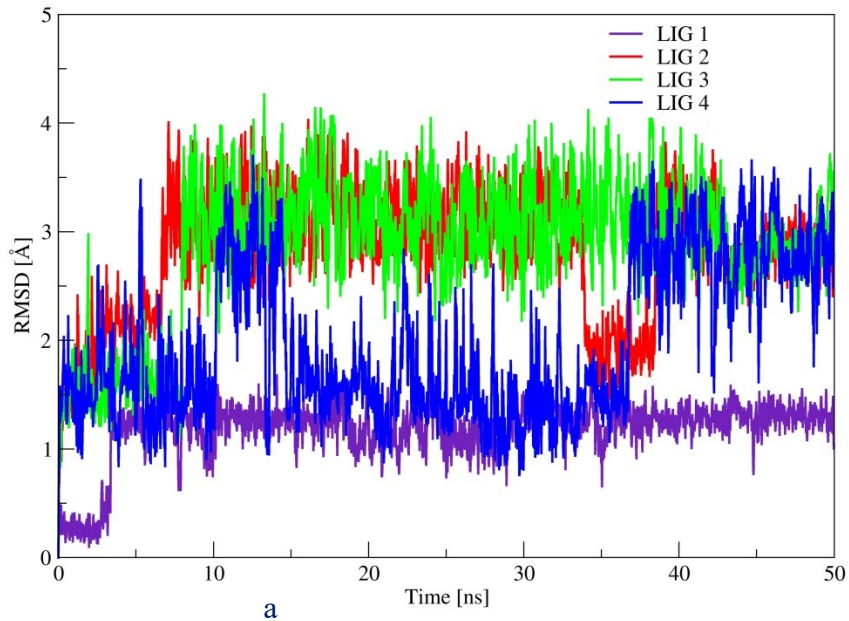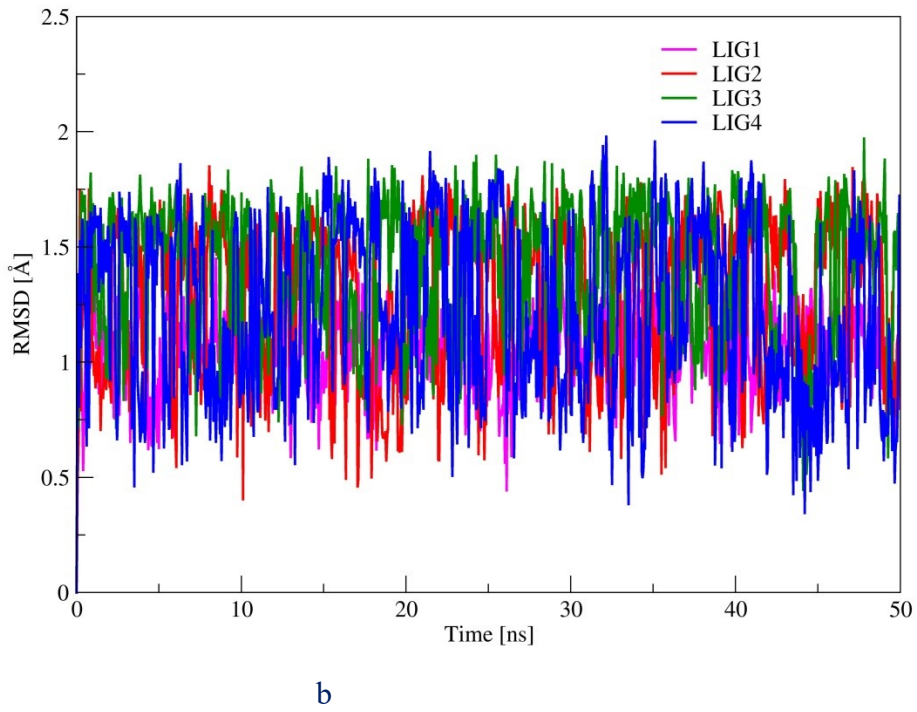

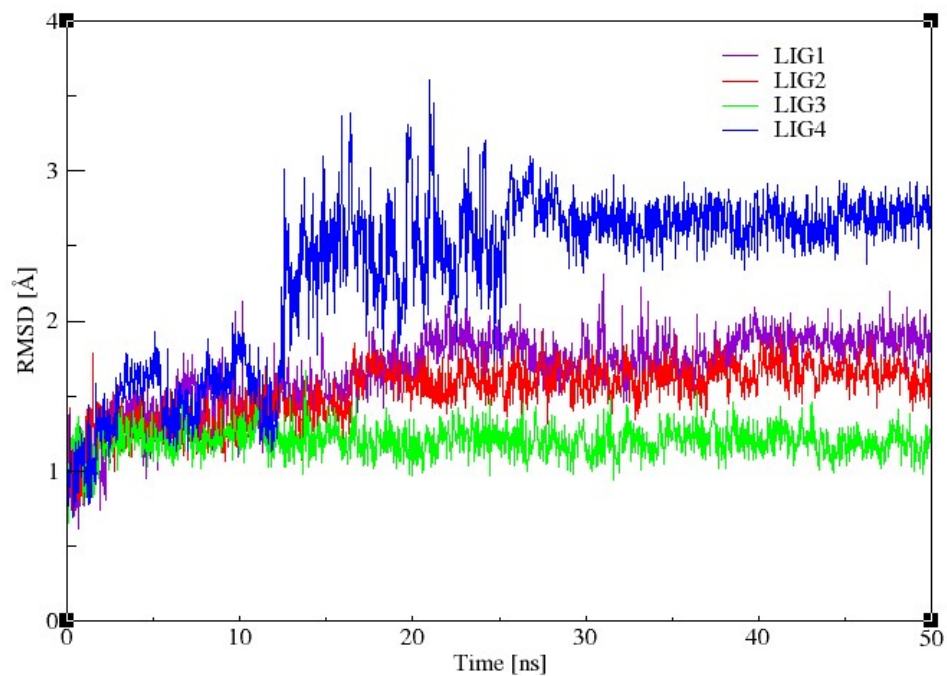

c

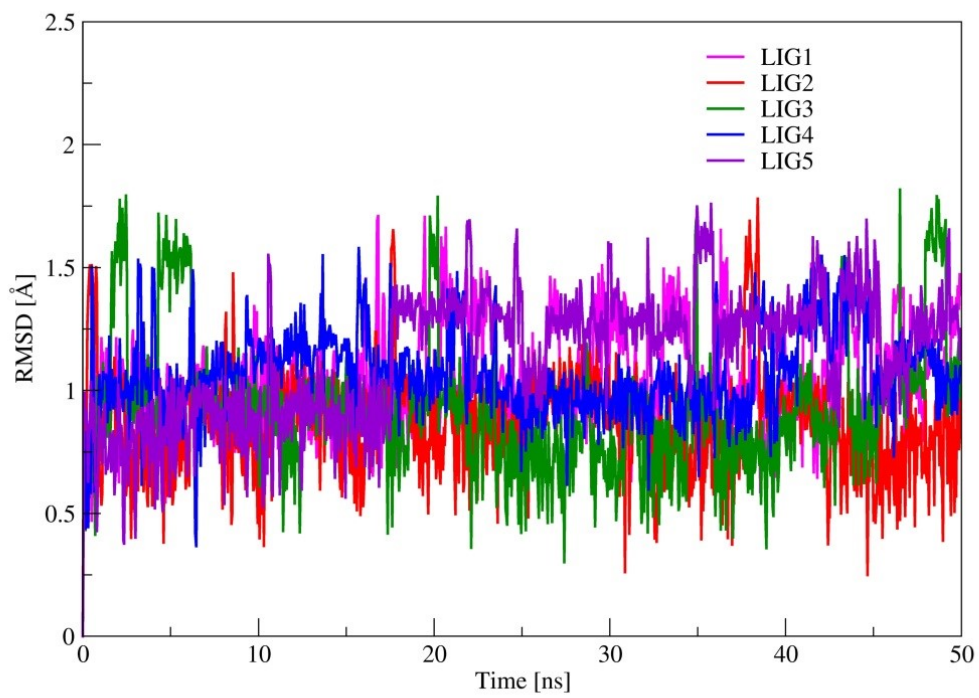

d

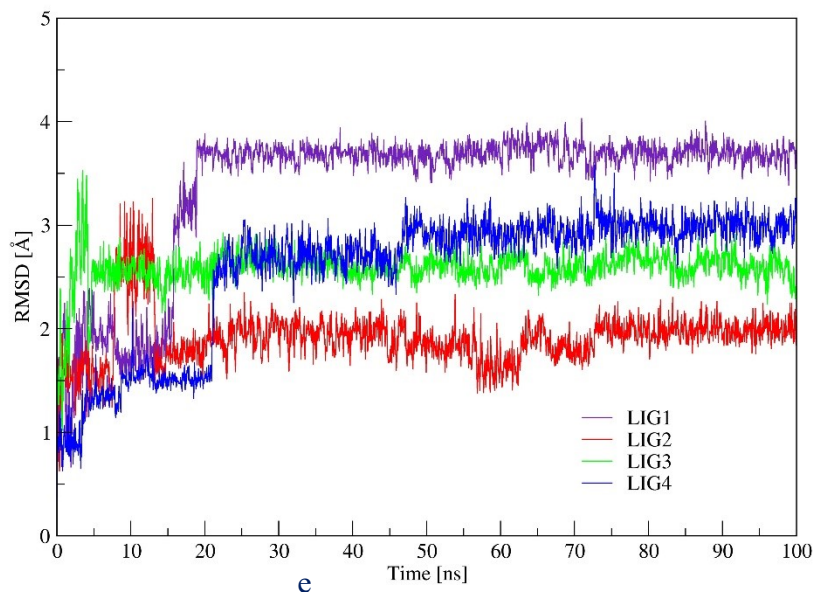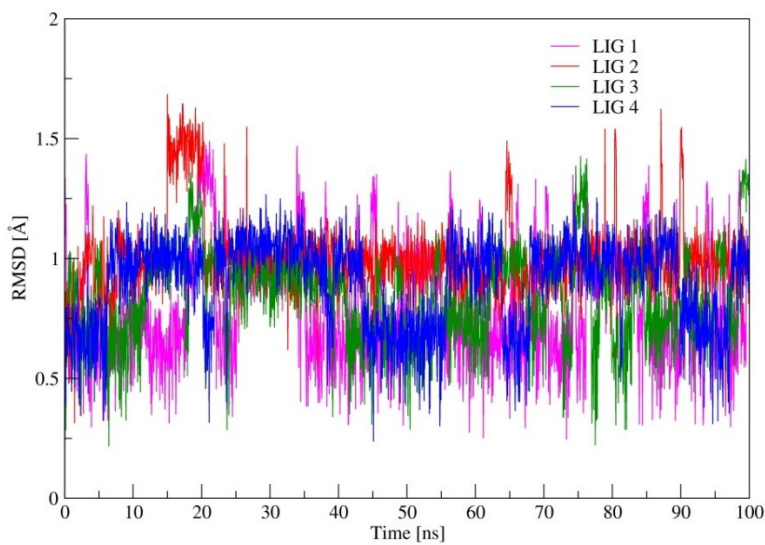

f

**Figure S3.** (a) Root mean square deviation (RMSD) of 4 non-adsorbed PX in water, (b) non-adsorbed MMC in water, (c) RMSD of 4 PX adsorbed on the BNNS surface after 50 ns simulation time, (d) RMSD of 5 MMC adsorbed on the BNNT surface after 50 ns simulation time, (e) RMSD of 4 PX adsorbed on the BNNS surface during 100 ns simulation time in the system containing PX and MMC on BNNS, and (f) RMSD of 4 MMC adsorbed on the BNNS surface during 100 ns simulation time in the system containing PX and MMC on BNNS.

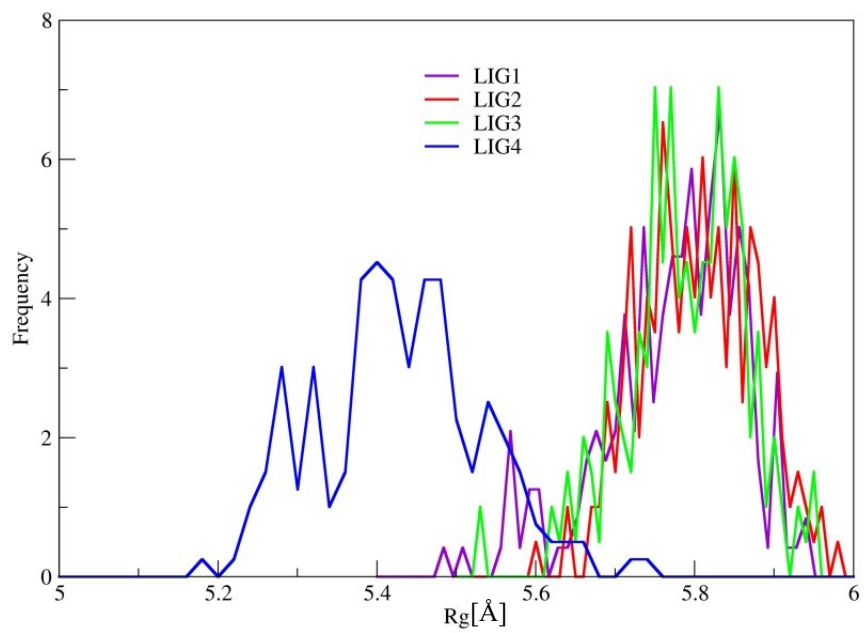

a

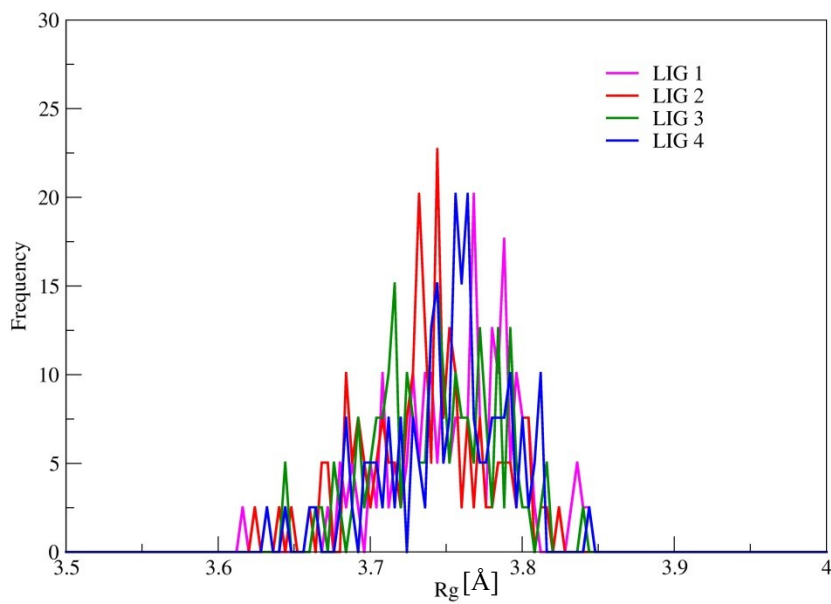

b

**Figure S4.** Distribution of radius of gyration of (a) non-adsorbed PXs in water (b) non-adsorbed MMCs in water.

## Mass density profile

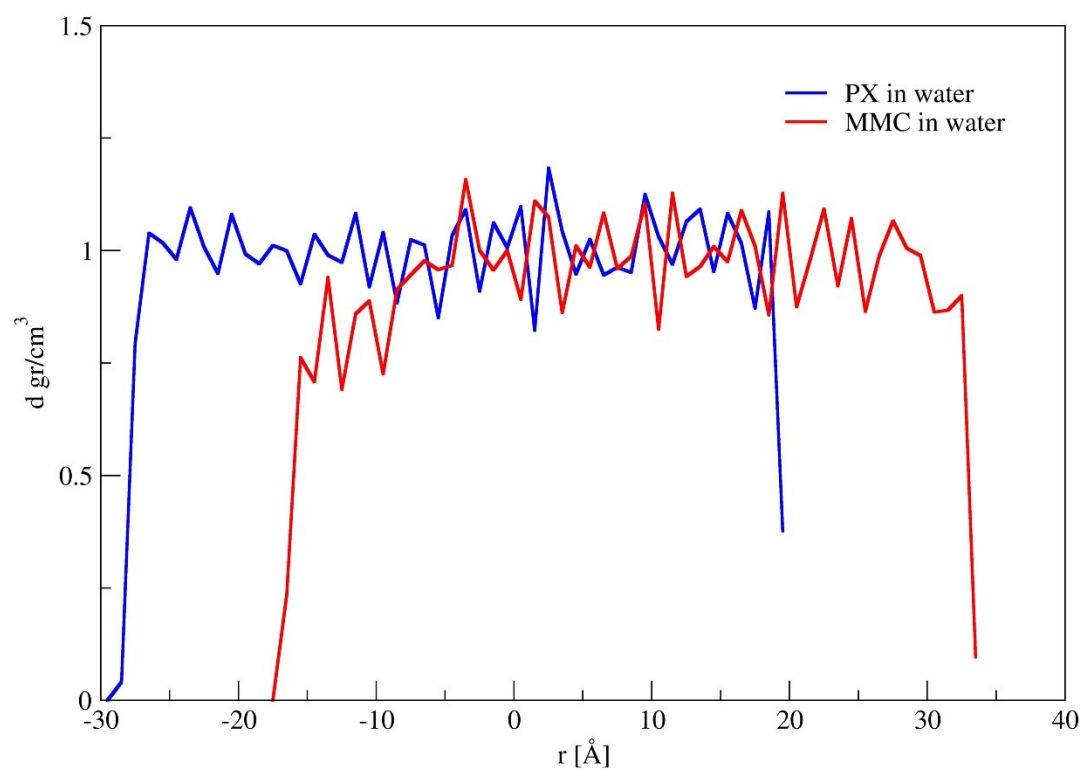

**Figure S5.** Comparison of the density profile distribution of water molecules of two systems of drug molecules in water solely.

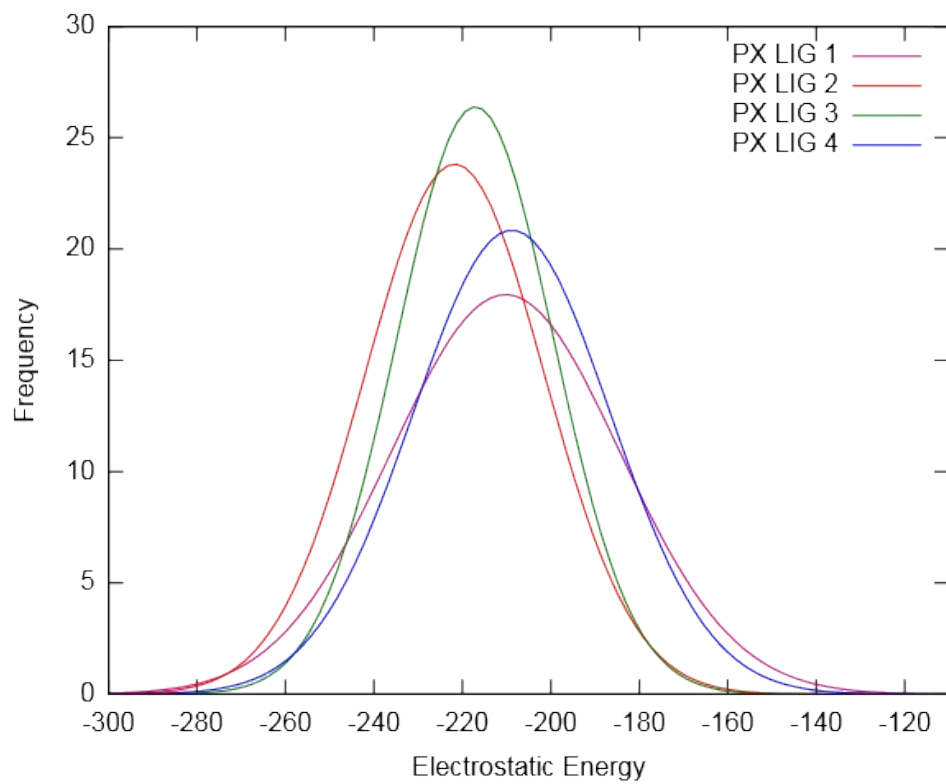

a

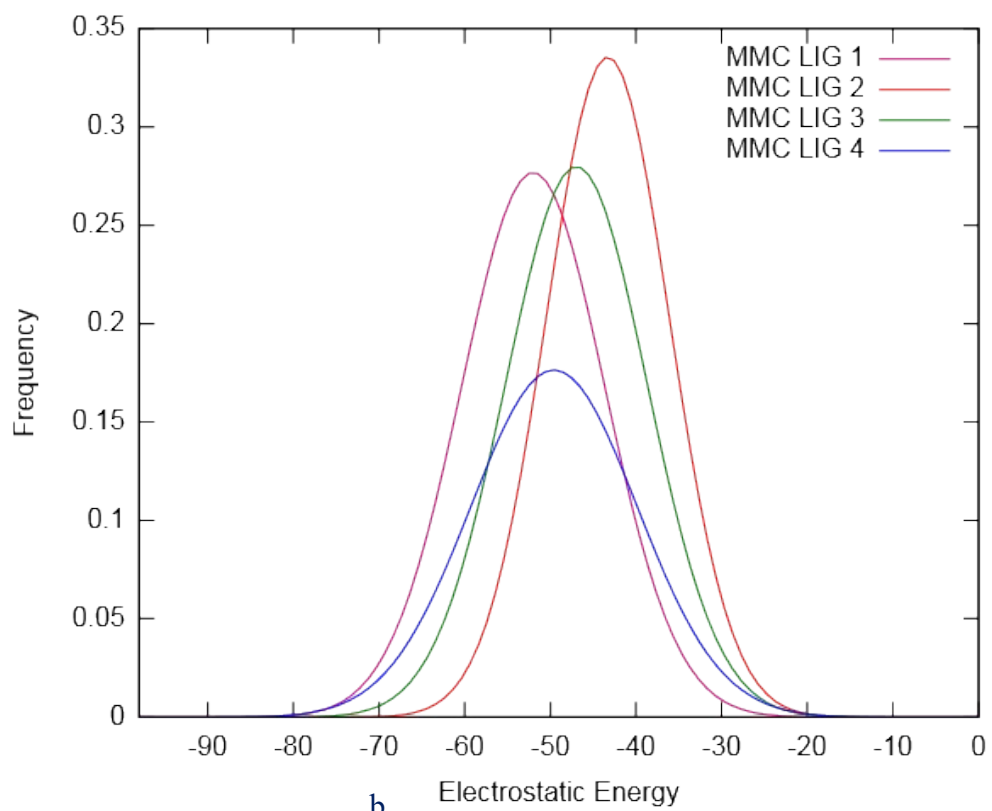

b

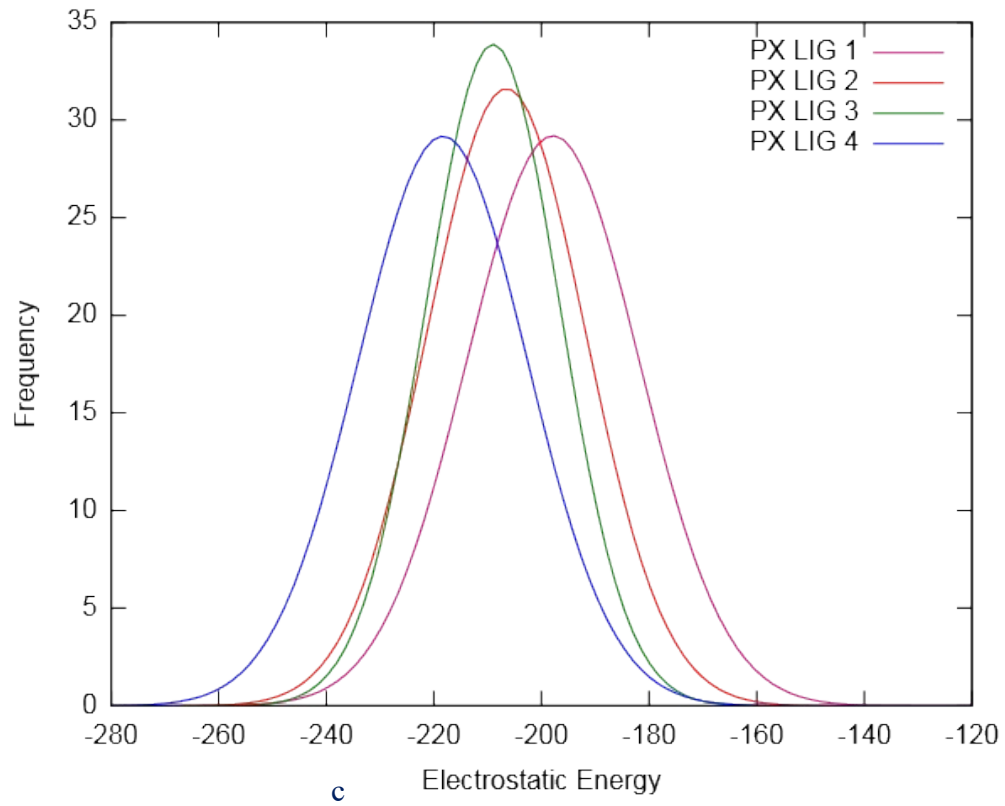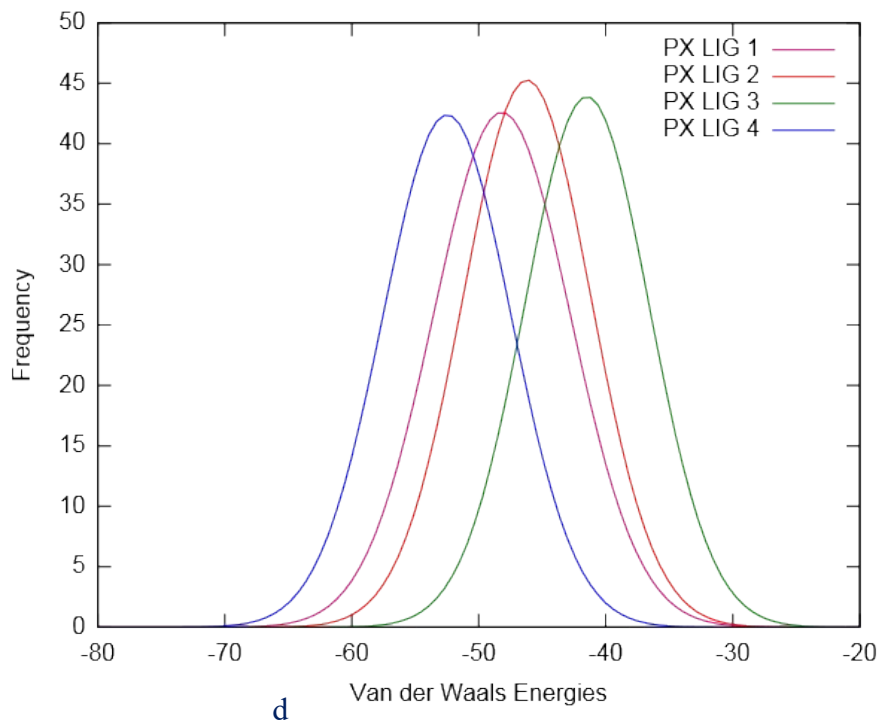

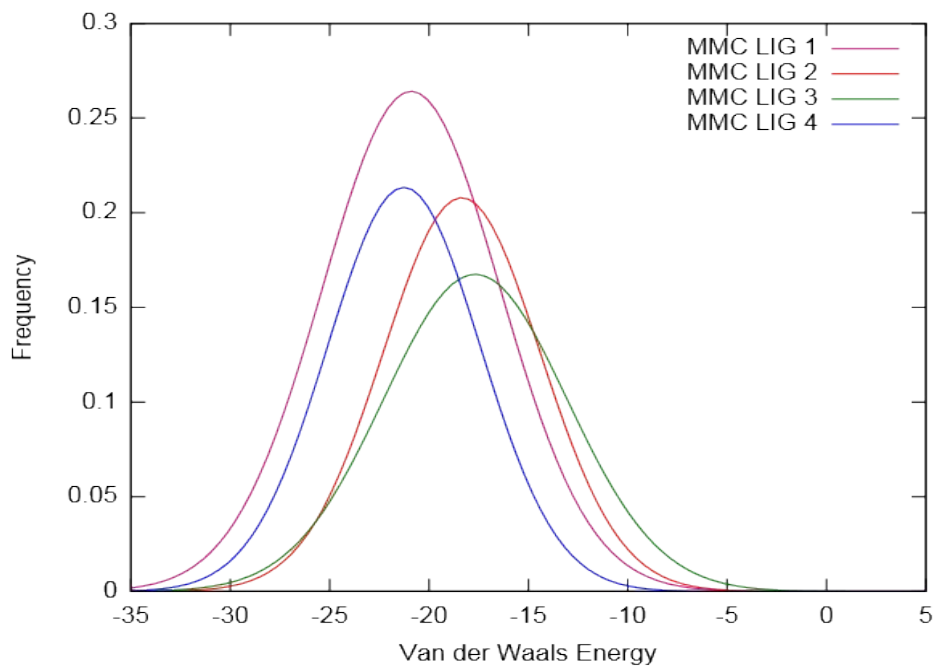

e

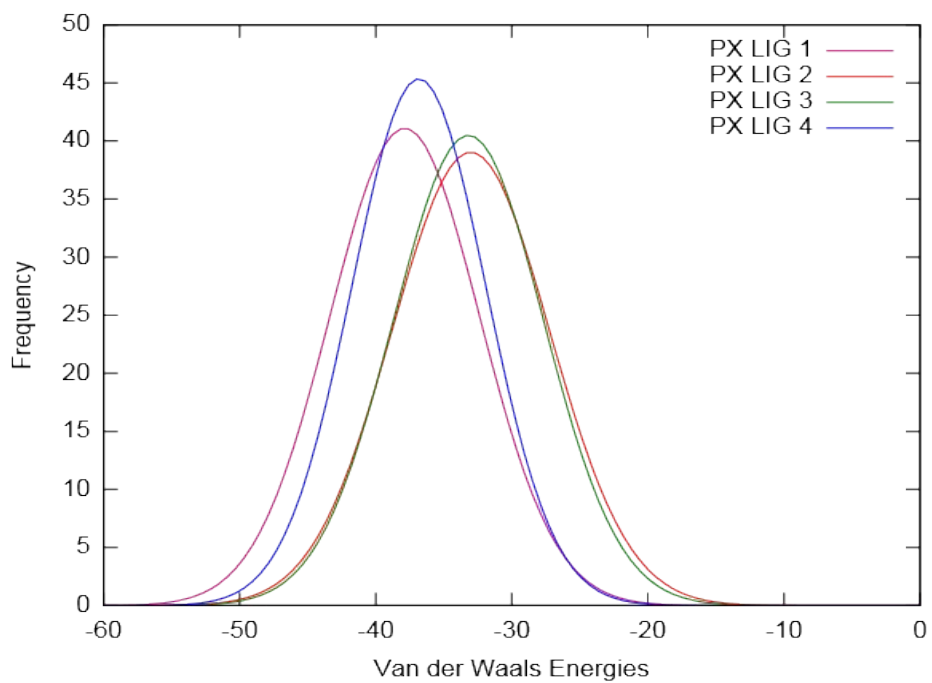

f

**Figure S6.** Normalized distribution of electrostatic contributions of (a) non-adsorbed PXs in water system (b) non-adsorbed MMCs in water system (c) PX ligands adsorbed on the BNNS surface, and normalized distribution of van der Waals energies of (d) non-adsorbed PXs in water system (e) non-adsorbed MMCs in water system (f) PX ligands adsorbed on the BNNS surface



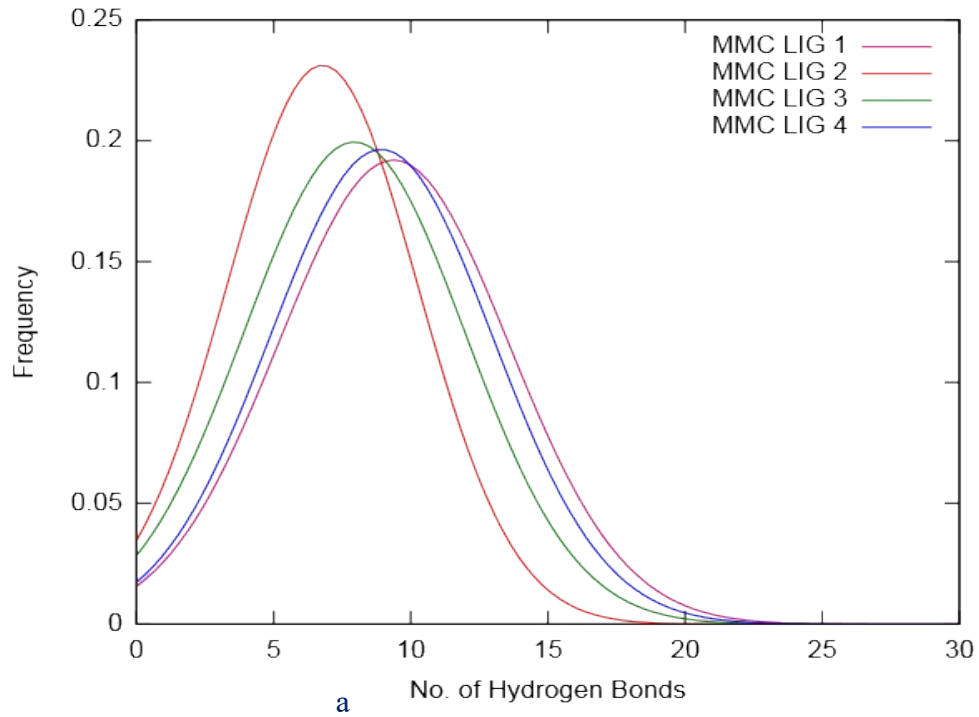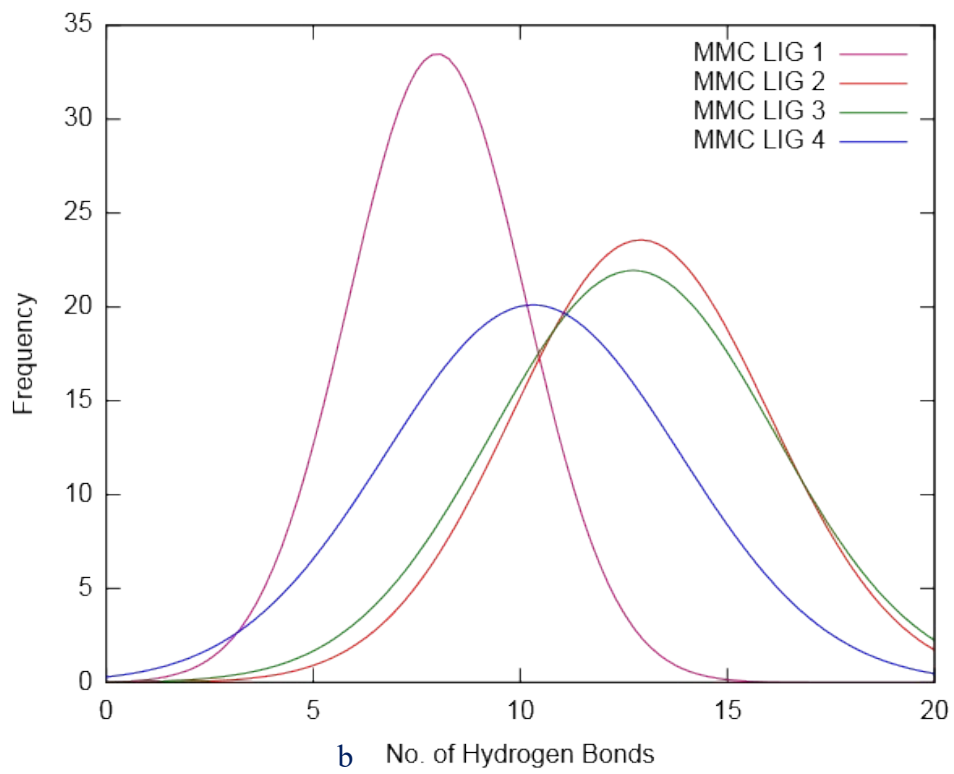

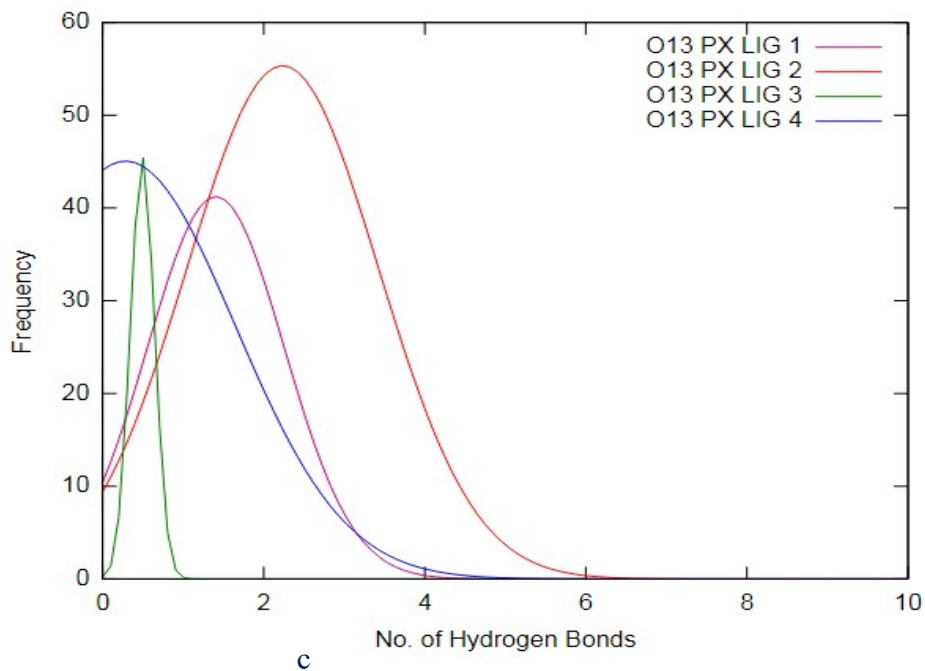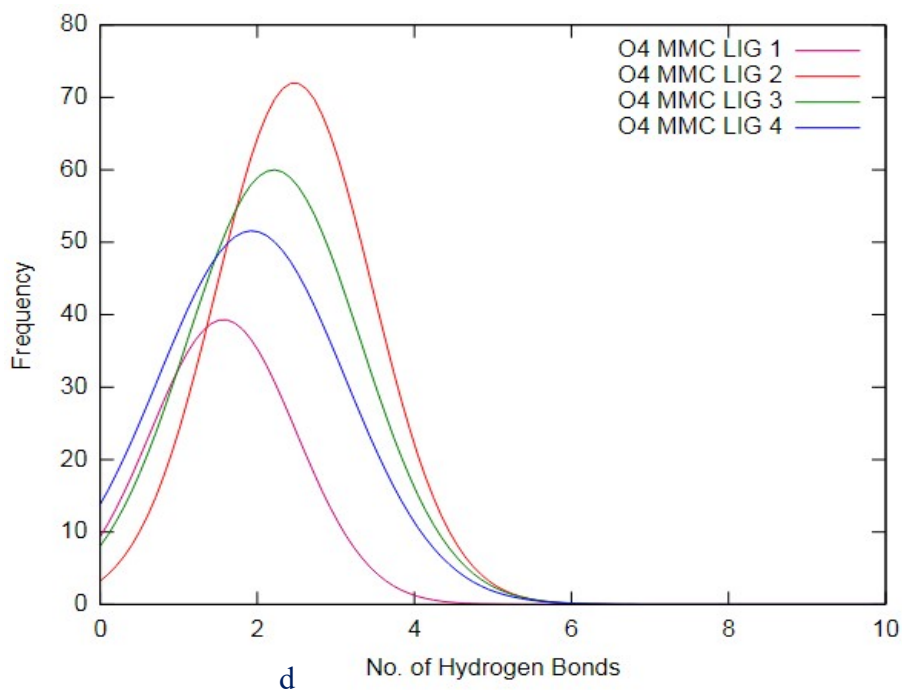

**Figure S7.** Distribution of normalized number of hydrogen bonds of (a) non-adsorbed MMCs in water system (b) MMC ligands adsorbed on the BNNS surface along the 100 ns simulation time in the system contains PX and MMC on BNNS (c) oxygen atoms of MMC (d) oxygen atom of PX ligands in the system contains PX and MMC on BNNS.

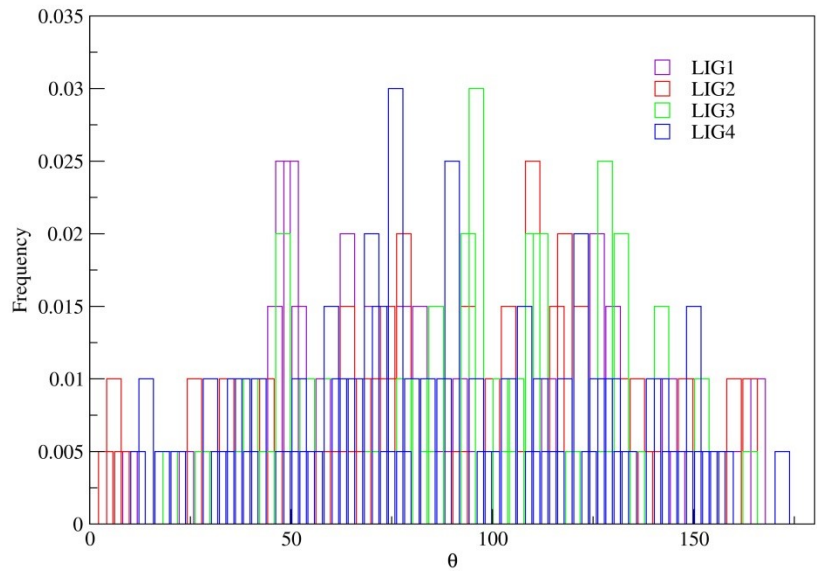

a

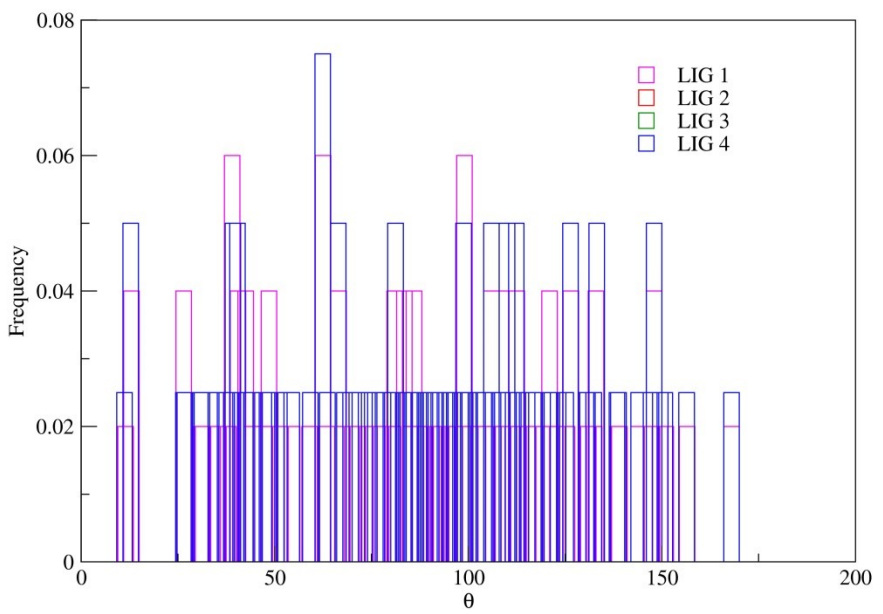

b

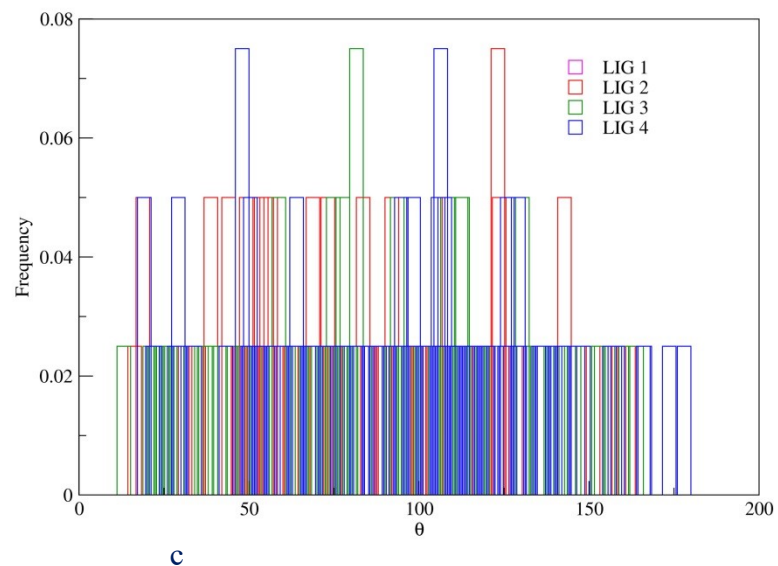

**Figure S8.** Distribution of angle of water molecules dipole moment vector for (a) non-adsorbed PXs in water system (b) non-adsorbed MMCs in water system (c) MMC ligands adsorbed on the BNNS surface along the 100 ns simulation time in the system contains PX and MMC on BNNS.

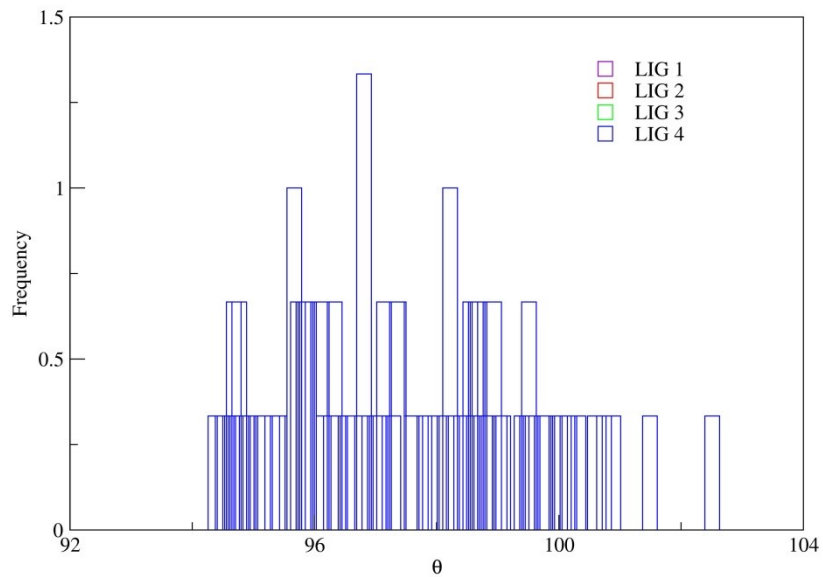

a

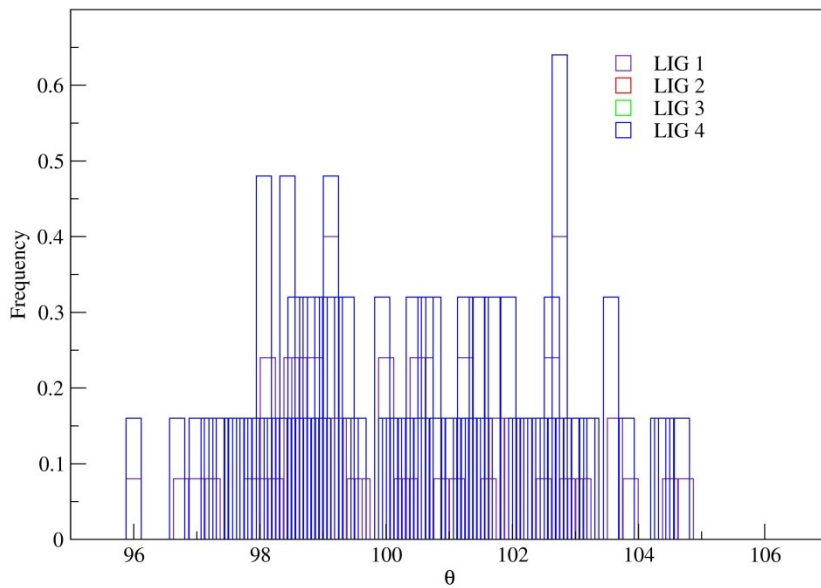

b

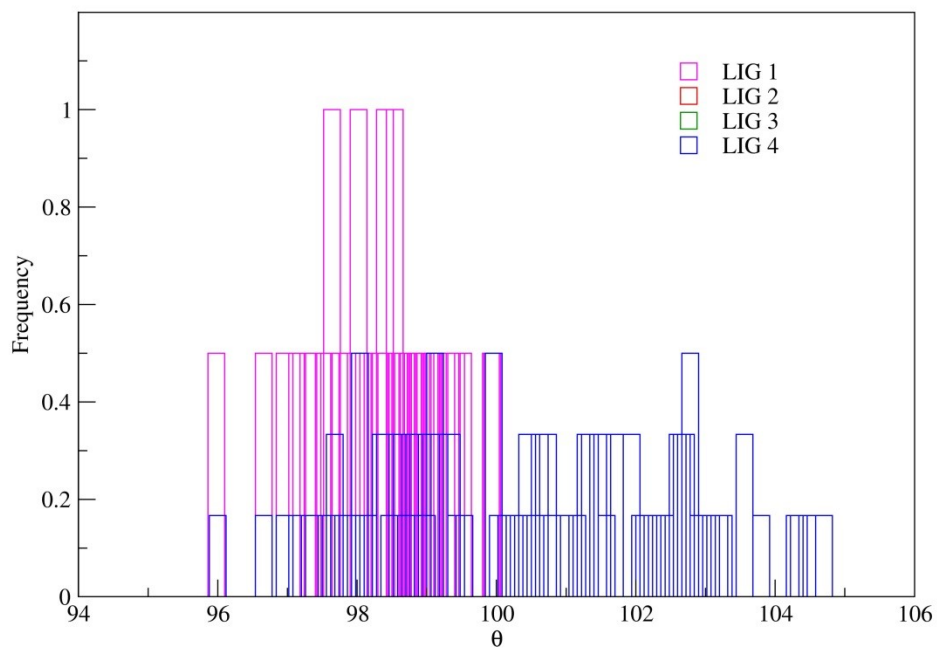

c

**Figure S9.** Distribution of angle of PX and MMC ligands dipole moment vector for (a) PX ligands adsorbed on the BNNS surface (b) PX ligands adsorbed on the BNNS surface along the 100 ns simulation time in the system contains PX and MMC on BNNS, (c) MMC ligands adsorbed on the BNNS surface along the 100 ns simulation time in the system contains PX and MMC on BNNS.
